# Supplementary material
Source: PubMed Central journal article supplement (PMC9674949)
Supplement: mmc1.pdf [file mmc1.pdf]

**The American Journal of Human Genetics, Volume 109**

**Supplemental information**

**FastRNA: An efficient solution for PCA  
of single-cell RNA-sequencing data based  
on a batch-accounting count model**

**Hanbin Lee and Buhm Han**

## Supplementary Figures

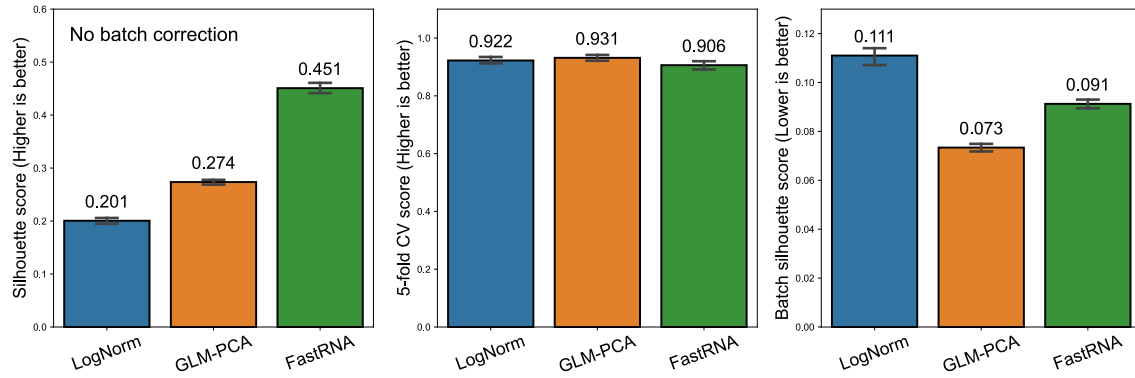

**Figure S1: Benchmark of common normalization methods in a PBMC dataset from three 10X experiments.** As Figure 3a-3c but log-normalization, GLM-PCA and FastRNA without batch correction.

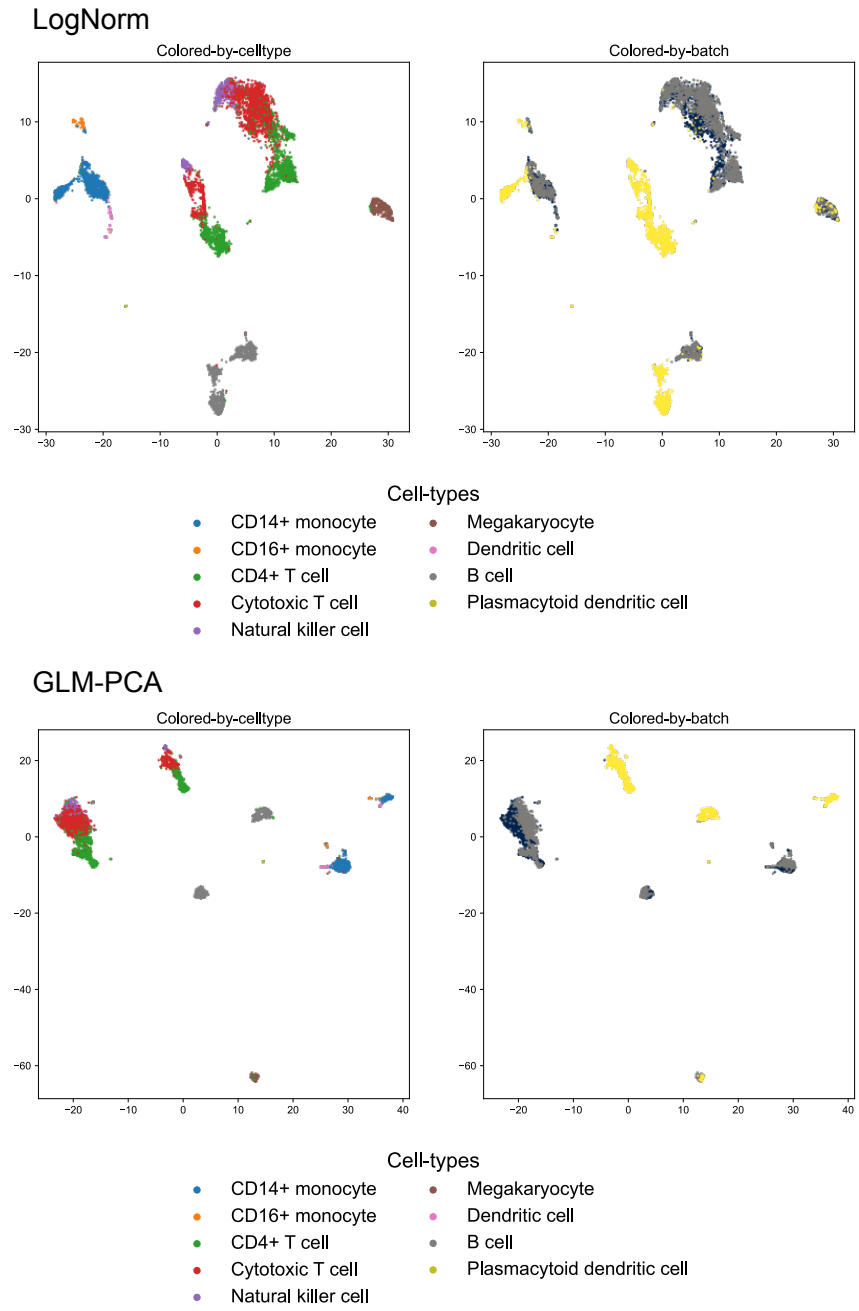

**Figure S2: Benchmark of common normalization methods in a PBMC dataset from three 10X experiments.** As Figure 3d-3e but log-normalization and GLM-PCA without batch correction.

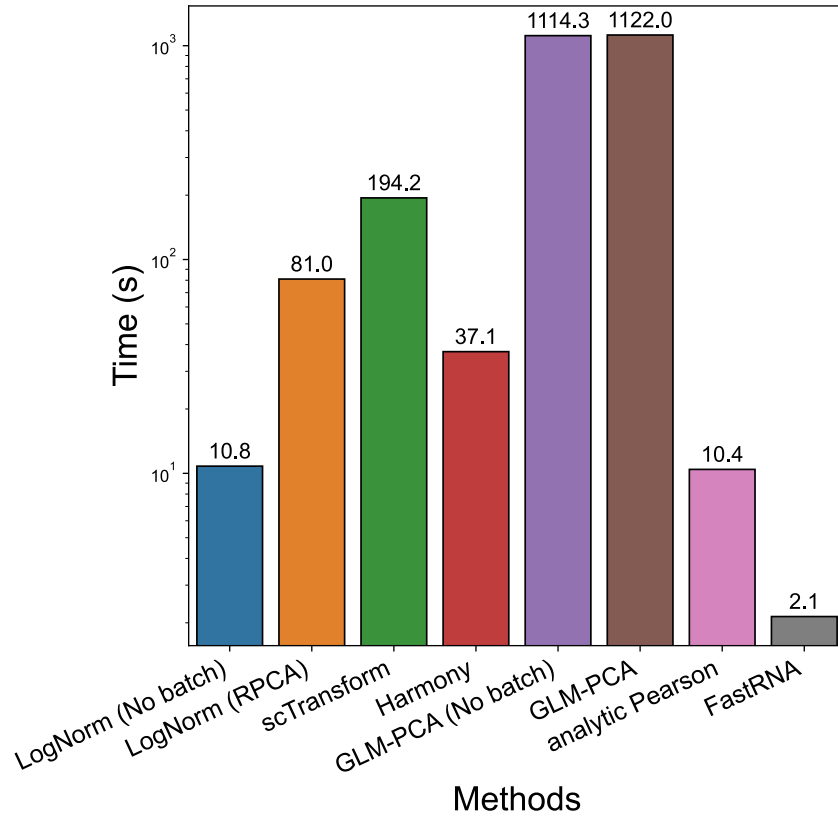

**Figure S3: Benchmark of common normalization methods in a PBMC dataset from three 10X experiments.** Runtime of eight methods. Total 9806 cells from three batches.
